# Supplementary material for: Habitat conditions strongly affect macro- and microelement concentrations in Taraxacum microspecies growing on coastal meadows along a soil salinity gradient
Source: PeerJ. 2020 Nov 24;8:e10233. doi: 10.7717/peerj.10233 (PMC7694557; doi:10.7717/peerj.10233)
Supplement: Supplemental Information 1 [file peerj-08-10233-s001.xlsx]

## Sheet: Raw data
Sample	Species	leaf Na	leaf K	leaf Ca	leaf Mg	leaf Cu	leaf Fe	leaf Mn	leaf Zn	Cr	Mo	soil Ece	soil pH	org.matter	soil K	soil Mg	soil Ca
Tar.bal 1	Tar.bal	1727.89	1073.27	466.569	164.916	5.01917	26.7548	1.8795	15.1923	2.4138	1.48794	4.11	5.6	61.3	15.8	278	6672.81
Tar.bal 2	Tar.bal	1522.73	1438.63	454.703	165.84	2.70616	26.8729	2.74555	13.0893	2.09641	0.461427	4.05	5.6	63.2	15.3	275	6600.81
Tar.bal 3	Tar.bal	906.315	1576.93	370.994	115.348	1.43931	10.3372	2.57401	5.35213	0.894853	0.900808	2.154	5	68.8978	36.2	203.4	6571.95
Tar.bal 4	Tar.bal	1119.64	2044.48	427.459	120.433	1.13613	10.8684	2.449	5.31032	0.650673	0.01	2.19	5.1	65.2	37.4	204.5	6528.95
Tar.bal 5	Tar.bal	1194.6	2049.62	419.086	138.019	1.15986	11.3908	2.82275	5.26229	0.719279	0.01	2.21	5.3	65.4	38.2	204.9	6371.95
Tar.bal 6	Tar.bal	1956.27	3202.27	770.077	275.31	1.0335	13.4462	4.52999	6.08153	0.661618	0.389205	4.19	5.6	59.6523	16.3	280	6483.81
Tar.bal 7	Tar.bal	1324.66	1968.52	447.229	124.332	0.989616	10.5633	2.64205	5.04396	0.487526	0.01	2.529	5.5	73.2379	23.5	257.2	6623.79
Tar.bal 8	Tar.bal	780.978	1403.96	337.1	93.9873	1.11318	8.89451	1.81431	4.84122	0.511634	0.382824	2.05	5.1	67.5	34.6	201.3	6071.95
Tar.bal 9	Tar.bal	1456.58	3306.8	708.383	298.405	1.713	18.1258	2.97623	6.42207	0.683542	0.01	2.66	5.9	74.0165	26.1	291.4	7567.82
Tar.bal 10	Tar.bal	1408.63	2078.61	654.03	188.223	2.14584	16.5579	4.31548	8.1695	1.05833	0.128932	2.45	5.5	72.5	22.9	254.4	6623.79
Tar.nor I1	Tar.nor I	1121.27	842.166	419.188	114.796	5.96272	29.8114	1.6901	16.5586	2.369	0.01	2.41	5.9	72.0165	22.1	279.4	7223.79
Tar.nor I2	Tar.nor I	843.931	1236.72	364.476	143.159	3.85134	30.2524	0.794417	16.105	2.9206	0.01	2.05	5.1	67.5	34.6	201.3	5271.95
Tar.nor I3	Tar.nor I	878.42	929.504	379.868	95.135	4.66624	33.4872	0.161618	18.0409	3.13098	0.760336	2.09	5	64.5	35.6	204.3	6571.95
Tar.nor I4	Tar.nor I	1448.13	1347.83	399.024	143.516	3.50952	28.1934	1.64593	13.9601	2.2826	0.01	4.05	5.9	63.2	15.3	275	5383.81
Tar.nor I5	Tar.nor I	1324.39	1658.39	421.544	166.789	4.56085	34.6718	1.41702	17.8252	2.44102	0.203904	2.529	5.5	73.2379	23.5	257.2	6623.79
Tar.nor I6	Tar.nor I	1323.33	1178.88	384.398	127.203	2.75457	22.6011	2.12562	12.461	2.11361	0.337277	2.51	5.6	73.1379	23.9	255.2	6823.79
Tar.nor I7	Tar.nor I	1179.03	1451.95	373.73	137.399	4.76373	32.0118	0.88843	13.7835	2.18629	2.79814	2.61	5.9	72.0165	23.1	289.4	7577.82
Tar.nor I8	Tar.nor I	563.602	968.713	243.339	72.2392	1.40519	9.43893	1.66613	5.27615	0.954555	1.14377	2.01	5	67.5	34.6	201.3	5571.95
Tar.nor I9	Tar.nor I	781.94	1321.36	341.708	88.4296	1.11018	8.90903	2.2464	5.06454	0.658637	0.86337	2.03	5.1	67.5	34.6	201.3	6571.95
Tar.nor I10	Tar.nor I	1192.95	1575.8	336.788	156.804	3.02091	23.9203	1.40814	11.9056	1.78574	0.01	2.51	5.9	71.0165	22.1	281.4	7323.79
Tar.nor II1	Tar.nor II	410.378	1260.83	279.387	121.643	0.750556	5.92002	1.14146	3.83652	0.658414	0.200266	1.269	5	42.4131	14	102.9	3571.95
Tar.nor II2	Tar.nor II	641.972	2195.58	414.401	186.914	0.636659	8.13431	1.4967	3.69823	0.496703	0.497526	2.01	5	67.5	34.6	201.3	6071.95
Tar.nor II3	Tar.nor II	546.906	932.732	240.442	114.639	0.757878	6.29193	0.914683	2.72412	0.379352	0.624361	1.35	5.1	45.4131	17	108.9	3271.95
Tar.nor II4	Tar.nor II	169.721	376.599	140.778	53.0596	0.728635	4.77708	0.307183	2.65191	0.444511	0.393879	0.184	4.1	11.649	10.1	15.1	450
Tar.nor II5	Tar.nor II	616.786	1100.81	256.243	130.337	0.644809	7.06032	1.27536	2.99925	0.609899	0.0919706	1.3	5	43.4131	15	103.9	3471.95
Tar.nor II6	Tar.nor II	441.419	1178.38	261.206	117.869	0.741741	5.70177	1.14824	3.13902	0.479023	0.25065	0.235	4.8	10.7208	8.1	24	720
Tar.nor II7	Tar.nor II	614.614	1602.86	347.44	168.919	0.559926	6.13099	1.73725	6.20747	0.515309	0.12151	1.45	5.1	48.4131	19	109.9	3271.95
Tar.nor II8	Tar.nor II	311.688	999.586	213.142	98.5948	0.684528	5.3378	0.729915	2.87087	0.466487	0.01	0.194	4.6	12.649	15.1	19.1	570
Tar.nor II9	Tar.nor II	588.657	1646.43	324.585	153.673	0.791594	6.6022	1.21283	3.57969	0.540814	0.01	1.33	5.1	44.4131	17	105.9	3471.95
Tar.nor II10	Tar.nor II	326.999	1902.34	340.414	140.19	0.744748	7.12007	1.33549	3.59851	0.499983	0.375418	0.25	4.8	10.9	8.3	25	750
Tar.hae 1	Tar.hae	645.892	686.843	271.701	107.787	1.82263	11.9523	0.644722	6.83736	0.89774	0.0150424	0.23	4.6	10.2208	7.6	22	644
Tar.hae 2	Tar.hae	332.924	1062.06	368.143	118.666	1.34499	8.9308	0.694145	5.3717	0.785389	0.01	0.184	4.1	11.649	10.1	15.1	458
Tar.hae 3	Tar.hae	413.056	1039.66	353.564	102.043	1.06054	10.8929	0.628213	5.70137	0.995244	0.01	0.21	4.8	14.649	19.8	19.8	570
Tar.hae 4	Tar.hae	658.678	831.395	379.802	129.536	1.74313	11.4706	0.827092	7.24789	1.12579	0.0977423	0.25	4.9	10.9208	8.7	29	880
Tar.hae 5	Tar.hae	717.876	1005.98	326.051	98.3586	1.48533	10.9259	1.6939	6.29827	0.838171	0.717437	1.269	5	42.4131	14	102.9	3571.95
Tar.hae 6	Tar.hae	646.929	699.889	339.541	119.265	1.36393	10.6268	0.801143	5.8152	1.05456	0.74403	0.25	4.8	10.2208	7.7	21	654
Tar.hae 7	Tar.hae	484.983	1083.79	322.846	131.469	1.71661	9.19705	0.505394	5.8651	1.05655	1.41612	0.194	4.1	12.649	19.1	18.1	526
Tar.hae 8	Tar.hae	566.867	629.757	259.454	114.847	1.50255	9.18504	0.578192	5.78681	0.555671	0.01	0.25	4.9	11.7208	8.9	26	767
Tar.hae 9	Tar.hae	767.731	823.186	474.759	190.083	2.25551	13.0809	0.995778	8.46107	1.77526	0.20628	1.3	5.3	49.4131	16	107.9	3271.95
Tar.hae 10	Tar.hae	536.079	745.47	440.709	149.783	1.70311	12.4754	1.36035	7.05293	1.06445	0.01	0.235	4.8	10.7208	8.1	24	718

## Sheet: Explanations
Bosiacka B., Myśliwy M., Bosiacki M. Habitat conditions strongly affect macro- and microelement concentrations in Taraxacum microspecies growing on costal meadows along a soil salinity gradient.
Supplementary 1: The raw data is showing macro- and microelement concentrations in 40 samples of three Taraxacum microspecies leaves, as well as soil properties of localities from which the leaves were picked off.
Tar.bal, Taraxacum balticum
Tar.nor I, Taraxacum nordstedtii
Tar.nor II, Taraxacum nordstedtii
Tar.hae, Taraxacum haematicum
